# Supplementary material for: Integrated Analysis of Tissue-Specific Gene Expression in Diabetes by Tensor Decomposition Can Identify Possible Associated Diseases
Source: MDPI journal article supplement (doi:10.3390/genes13061097), 2022-06-20
Supplement: s1 [file s1]

# Supplementary Information

## 1 The brief description of the HOSVD algorithm

For demonstration, consider the tensor  $x_{ijk} \in \mathbb{R}^{N \times M \times K}$ . HOSVD is an algorithm that applies SVD to the unfolded tensor, either  $x_{i(jk)} \in \mathbb{R}^{N \times MK}$ ,  $x_{j(ik)} \in \mathbb{R}^{M \times NK}$ , or  $x_{k(ij)} \in \mathbb{R}^{K \times NM}$ ,

$$x_{i(jk)} = \sum_{\ell_1=1}^{\min(N, MK)} \lambda_{\ell_1} u_{\ell_1 i} v_{\ell_1 jk} \quad (1)$$

$$x_{j(ik)} = \sum_{\ell_2=1}^{\min(M, NK)} \lambda_{\ell_2} u_{\ell_2 j} v_{\ell_2 ik} \quad (2)$$

$$x_{k(ij)} = \sum_{\ell_3=1}^{\min(K, NM)} \lambda_{\ell_3} u_{\ell_3 k} v_{\ell_3 ij} \quad (3)$$

$$(4)$$

where  $u_{\ell_1 i} \in \mathbb{R}^{\min(N, MK) \times N}$ ,  $v_{\ell_1 jk} \in \mathbb{R}^{\min(N, MK) \times MK}$ ,  $u_{\ell_2 j} \in \mathbb{R}^{\min(M, NK) \times M}$ ,  $v_{\ell_2 ik} \in \mathbb{R}^{\min(M, NK) \times NK}$ ,  $u_{\ell_3 k} \in \mathbb{R}^{\min(K, NM) \times K}$ ,  $v_{\ell_3 ij} \in \mathbb{R}^{\min(K, NM) \times NM}$ . A core tensor  $G(\ell_1 \ell_2 \ell_3)$  can be calculated as

$$G(\ell_1 \ell_2 \ell_3) = \sum_{i=1}^N \sum_{j=1}^M \sum_{k=1}^K x_{ijk} u_{\ell_1 i} u_{\ell_2 j} u_{\ell_3 k}. \quad (5)$$

Subsequently, we obtain the following

$$x_{ijk} = \sum_{\ell_1=1}^N \sum_{\ell_2=1}^M \sum_{\ell_3=1}^K G(\ell_1 \ell_2 \ell_3) u_{\ell_1 i} u_{\ell_2 j} u_{\ell_3 k} \quad (6)$$

where  $u_{\ell_1 i} \in \mathbb{R}^{N \times N}$ ,  $u_{\ell_2 j} \in \mathbb{R}^{M \times M}$ , and  $u_{\ell_3 k} \in \mathbb{R}^{K \times K}$ . When  $u_{\ell_1 i}$ ,  $u_{\ell_2 j}$ , and  $u_{\ell_3 k}$ , are smaller than those computed in eqs. (1), (2), and (3), missing values are filled with zero. Then,  $u_{\ell_1 i}$ ,  $u_{\ell_2 j}$ , and  $u_{\ell_3 k}$  are the resultant orthogonal matrices obtained.

## 2 TD-based unsupervised FE with SD optimization

HOSVD was applied to  $x_{ijkmt}$ , and we obtained the following:

$$x_{ijkmt} = \sum_{\ell_1=1}^5 \sum_{\ell_2=1}^5 \sum_{\ell_3=1}^2 \sum_{\ell_4=1}^2 \sum_{\ell_5=1}^3 \sum_{\ell_6=1}^{31099} G(\ell_1 \ell_2 \ell_3 \ell_4 \ell_5 \ell_6) u_{\ell_1 j} u_{\ell_2 k} u_{\ell_3 m} u_{\ell_4 s} u_{\ell_5 t} u_{\ell_6 i} \quad (7)$$

where  $G(\ell_1 \ell_2 \ell_3 \ell_4 \ell_5 \ell_6) \in \mathbb{R}^{5 \times 5 \times 2 \times 2 \times 3 \times 31099}$  is a core tensor and  $u_{\ell_1 j} \in \mathbb{R}^{5 \times 5}$ ,  $u_{\ell_2 k} \in \mathbb{R}^{5 \times 5}$ ,  $u_{\ell_3 m} \in \mathbb{R}^{2 \times 2}$ ,  $u_{\ell_4 s} \in \mathbb{R}^{2 \times 2}$ ,  $u_{\ell_5 t} \in \mathbb{R}^{3 \times 3}$ , and  $u_{\ell_6 i} \in \mathbb{R}^{31099 \times 31099}$  are singular value matrices and orthogonal matrices.

After identifying  $u_{\ell_1 j}$ ,  $u_{\ell_2 k}$ ,  $u_{\ell_3 m}$ ,  $u_{\ell_4 s}$ , and  $u_{\ell_5 t}$  of interest, we attempted to identify  $G(\ell_1 \ell_2 \ell_3 \ell_4 \ell_5 \ell_6)$  with the largest absolute value and fixed  $\ell_1$  to  $\ell_5$ . Then, we attributed  $P$ -values to  $i$  by assuming that  $u_{\ell_6 i}$  obeys a Gaussian distribution as follows:

$$P_i = P_{\chi^2} \left[ > \left( \frac{u_{\ell_6 i}}{\sigma_{\ell_6}} \right)^2 \right] \quad (8)$$

where  $P_{\chi^2} [> x]$  is the cumulative  $\chi^2$  distribution under the assumption that it is larger than  $x$  and  $\sigma_{\ell_6}$  is the SD.  $P_i$  is corrected with the BH criterion [?].

The SD is optimized so that  $u_{\ell_6 i}$  obeys the Gaussian distribution (null hypothesis) as much as possible [?], and the optimization process is as follows. Initially, we compute the histogram  $h_p$ , which includes the number of  $i$  values that satisfy the following:

$$\frac{p}{N_p} \leq 1 - \text{adjusted} P_i \leq \frac{p+1}{N_p}, 0 \leq p \leq N_p - 1 \quad (9)$$

Then, the standard deviation of  $h_p$  for  $\text{adjusted} P_i > p_0$  for the threshold value  $p_0$ ,

$$\Delta h_p = \frac{1}{N'_p} \sum_{\text{adjusted } \frac{p}{N_p} > p_0} (h_p - \langle h_p \rangle)^2 \quad (10)$$

$$\langle h_p \rangle = \frac{1}{N'_p} \sum_{\text{adjusted } \frac{p}{N_p} > p_0} h_p \quad (11)$$

$$N'_p = \sum_{\text{adjusted } \frac{p}{N_p} > p_0} 1 \quad (12)$$

is minimized. Therefore, for  $1 - \text{adjusted} P_i < 1 - p_0$ ,  $h_p$  takes a constant value (i.e., it obeys the null hypothesis) as much as possible, whereas for  $1 - \text{adjusted} P_i > 1 - p_0$ ,  $h_p$  presents a peak value.

The  $P_i$  values are finally calculated using the optimized SD, and  $i$  values associated with adjusted  $P$ -values less than 0.01 are selected. Probes,  $is$ , are converted to gene symbols using the gene ID conversion tool in DAVID [?].

The genes selected are presumed to be coincident with the profiles associated with selected  $u_{\ell_1 j}$ ,  $u_{\ell_2 k}$ ,  $u_{\ell_3 m}$ ,  $u_{\ell_4 s}$ , and  $u_{\ell_5 t}$ ; this corresponds to the identification of differentially expressed genes.

For details, check sample R source code in supplementary materials.

### 3 Gene sepections

The results indicated that  $u_{2j}$  represents the dependence on time,  $u_{2m}$  represents the distinction between the controls and treatment,  $u_{1k}$  represents the independence of the replicate,  $u_{1s}$  represents the independence of strains, and  $u_{1t}$  represents the independence of tissues (Fig. S1). Table S1 presents

Table S1: The core tensor defined in eq. (7) when HOSVD is applied to data sets,  $G(2, 1, 2, 1, 1, \ell_6)$ .

| $\ell_6$ | $G(2, 1, 2, 1, 1, \ell_6)$ | $\ell_6$ | $G(2, 1, 2, 1, 1, \ell_6)$ |
|----------|----------------------------|----------|----------------------------|
| 1        | 3.505367                   | 6        | 6.227675                   |
| 2        | 8.092320                   | 7        | 6.890919                   |
| 3        | -15.707937                 | 8        | -3.287872                  |
| 4        | 9.134575                   | 9        | -1.529140                  |
| 5        | 6.723113                   | 10       | -9.158979                  |

$G(2, 1, 2, 1, 1, \ell_6)$ , and it shows that  $G(2, 1, 2, 1, 1, 3)$  has the highest absolute value. Then,  $u_{3i}$  (i.e.,  $\ell_6 = 3$ ) is used to select probes. The  $P_i$  values are determined using eq. (8), with  $\ell_6 = 3$ . SD optimization was performed, and  $\sigma_3 = 0.001514603$ . A histogram of  $1-P_i$  after SD optimization is presented in Figure S2 and the histogram is more similar to that of the null hypothesis, i.e., the combination of a flat region and a sharp peak. Then, the  $P$ -values corresponding to the  $i$ th probe are determined with eq. (8), and the  $P_i$  values are corrected by BH criterion. Finally, 2,452 selected probes are associated with adjusted  $P$ -values less than 0.01, and they are further converted to 2,281 gene symbols.

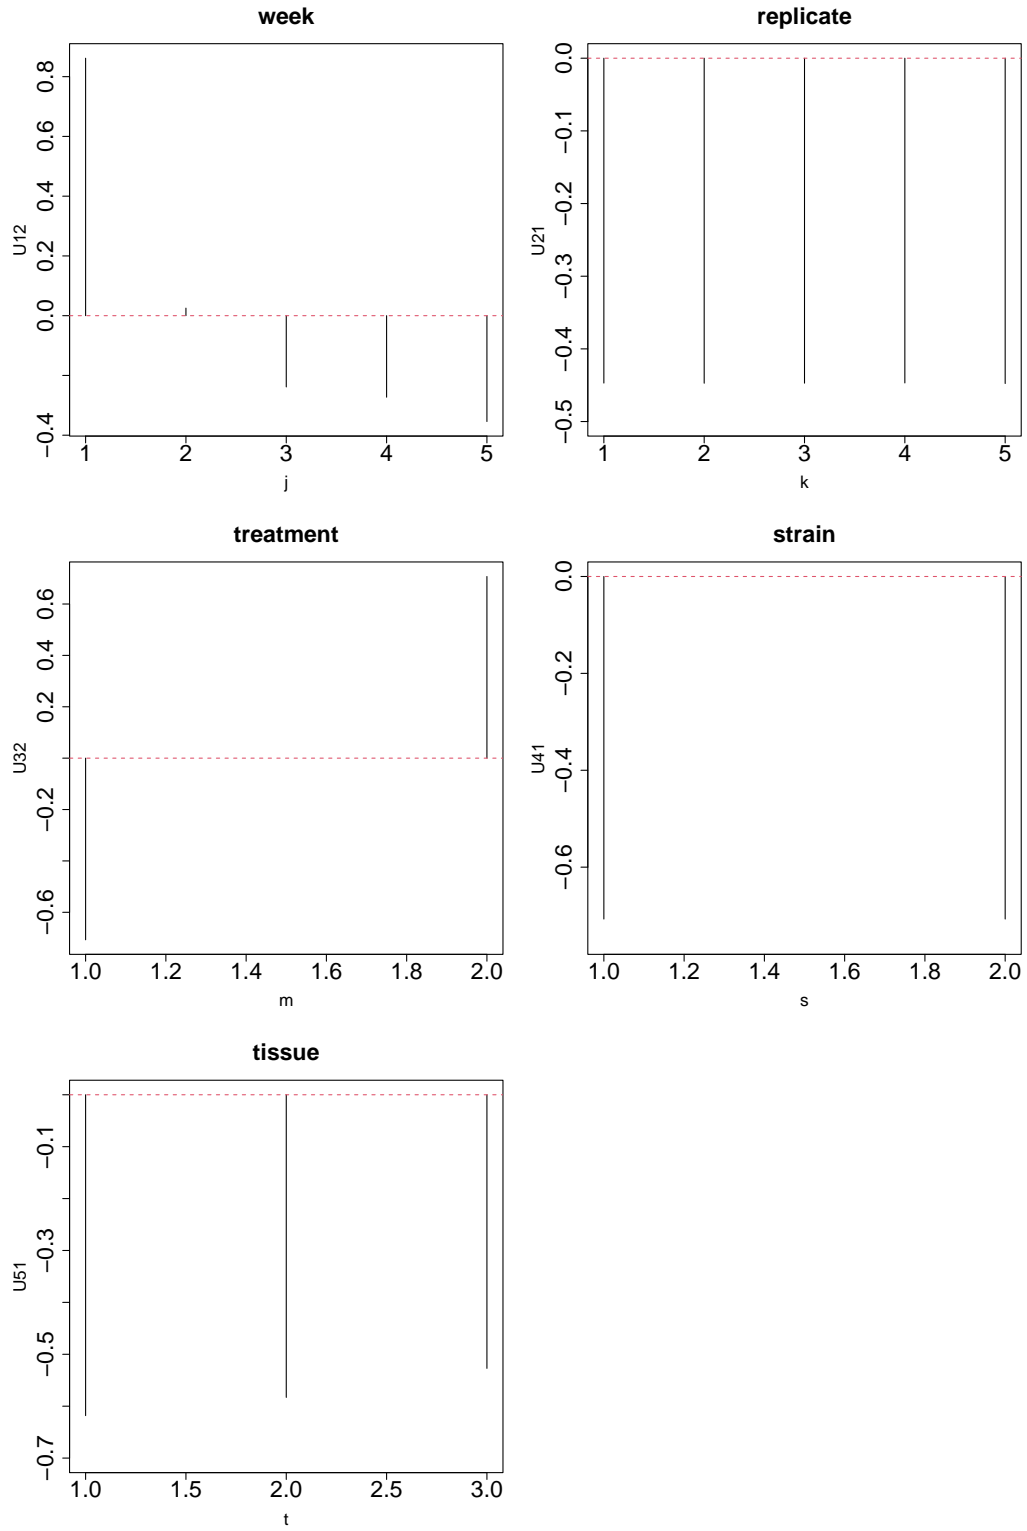

Figure S1: Singular value vectors defined in eq. (7) when HOSVD is applied to data sets.  $u_{2j}$  (week),  $u_{1k}$  (replicate),  $u_{2m}$  (treatment),  $u_{1s}$  (strain), and  $u_{1t}$  (tissue).

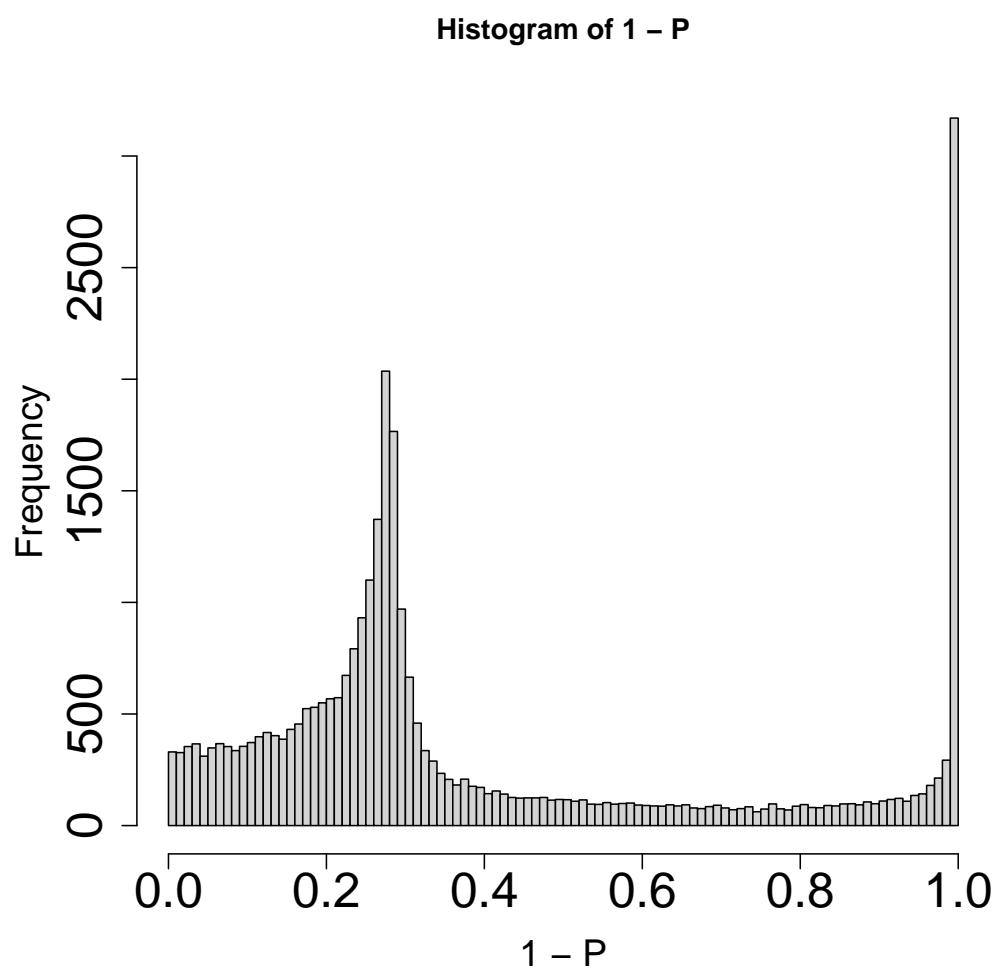

Figure S2: Histogram of  $1 - P_i$ .
